# Supplementary material for: Tn5 tagments and transposes oligos to single-stranded DNA for strand-specific RNA sequencing
Source: HighWire-hosted journal article supplement (doi:10.1101/gr.277213.122), 2023-03-01
Supplement: Supplemental_Data.pdf [file Supplemental_Data.pdf]

# **Tn5 tagments and transports oligos to single-strand DNA for strand-specific RNA sequencing**

YanJun Zhang<sup>1, #</sup>, Yin Tang<sup>1, #</sup>, Zhongxing Sun<sup>1</sup>, Junqi Jia<sup>1</sup>, Yuan Fang<sup>1</sup>, Xinyi Wan<sup>1</sup>, and Dong Fang<sup>1, 2, \*</sup>

<sup>1</sup> Zhejiang Provincial Key Laboratory for Cancer Molecular Cell Biology, Life Sciences Institute, Zhejiang University, Hangzhou, Zhejiang 310058, China.

<sup>2</sup> Department of Medical Oncology, Key Laboratory of Cancer Prevention and Intervention, Ministry of Education, The Second Affiliated Hospital, Zhejiang University School of Medicine, Hangzhou, Zhejiang, China.

<sup>#</sup> These authors contribute equally

<sup>\*</sup> Correspondence: dfang@zju.edu.cn

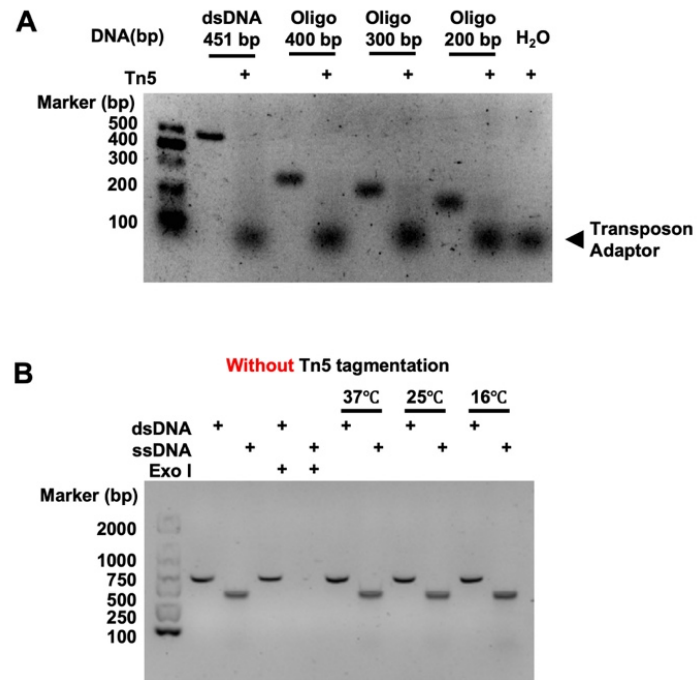

**Supplemental Figure S1. Tn5 transposon tagments ssDNA.**

(A) Tn5 transposon tagments synthesized oligos. Different lengths of oligos were used for Tn5 tagmentation. dsDNA was used as a positive control for the tagmentation.

(B) Purified dsDNA and ssDNA were incubated under different temperatures for 5 min.

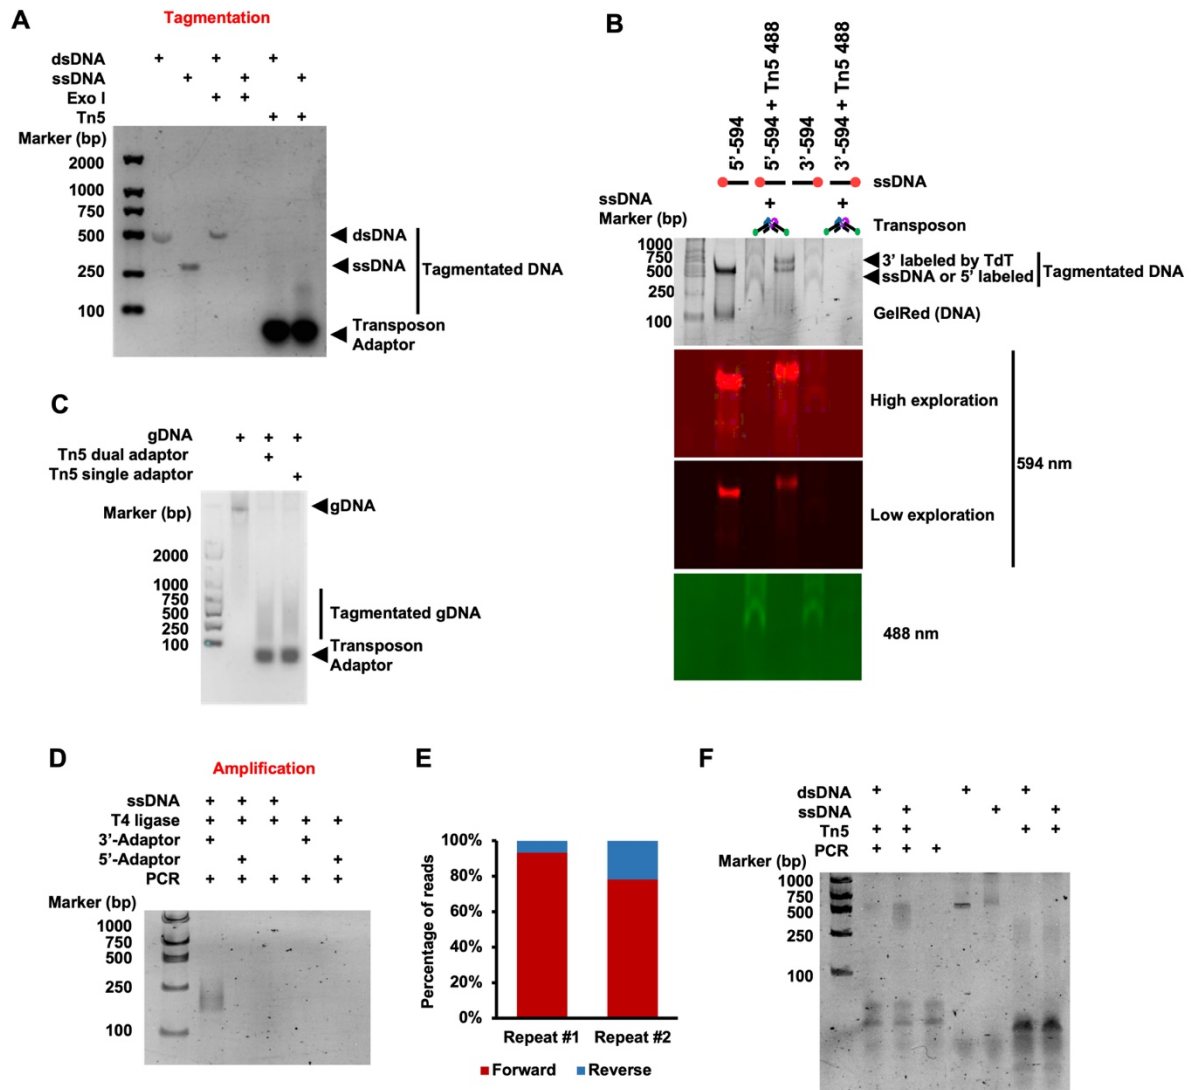

**Supplemental Figure S2. Tn5 transposon is used to generate the sequencing library from ssDNA.**

(A) Gel result presenting the tagmentation of dsDNA and ssDNA. Exo I was used to indicate the ssDNA.

(B) The Tn5 transposon can add oligos to the 5' end of ssDNA. ssDNA with Alexa Fluor 594 labeled 5' or 3' end was tagmented by the Tn5 transposon with Alexa Fluor 488 labeled adaptors.

(C) Gel result showing the transposition effect of Tn5 with dual and single adaptors. gDNA, genomic DNA from 293T cells.

(D) Gel result presenting TABLE-seq method could amplify the tagmented ssDNA by using adaptors ligated to the 3' end but not adaptors ligated to the 5' end.

(E) Sequencing reads from TABLE-seq were mapped to the forward direction of ssDNA. The percentage of reads mapped to the forward and reverse directions of ssDNA was shown.

(F) Gel result presenting TABLE-seq method could amplify the tagmented ssDNA.

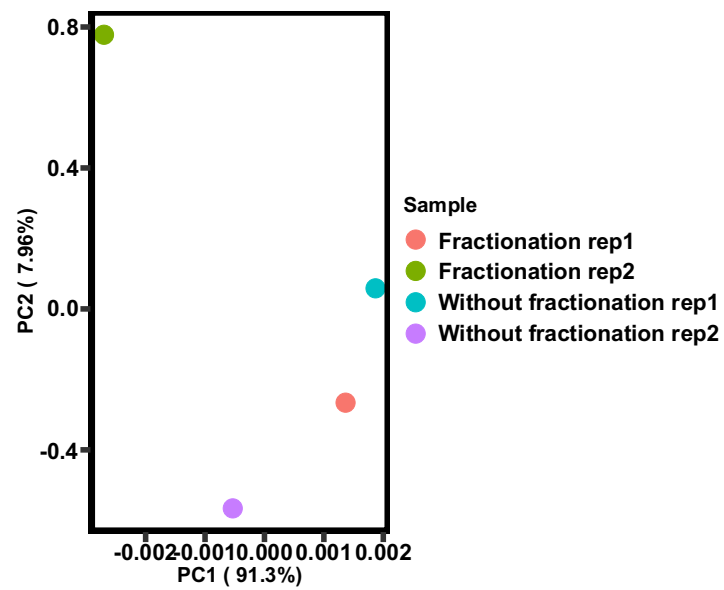

**Supplemental Figure S3. Fragmented and un-fragmented RNA are both suitable for TABLE-seq based RNA sequencing.**

Gene expression PCA plot showing the principal component between different sequencing results.

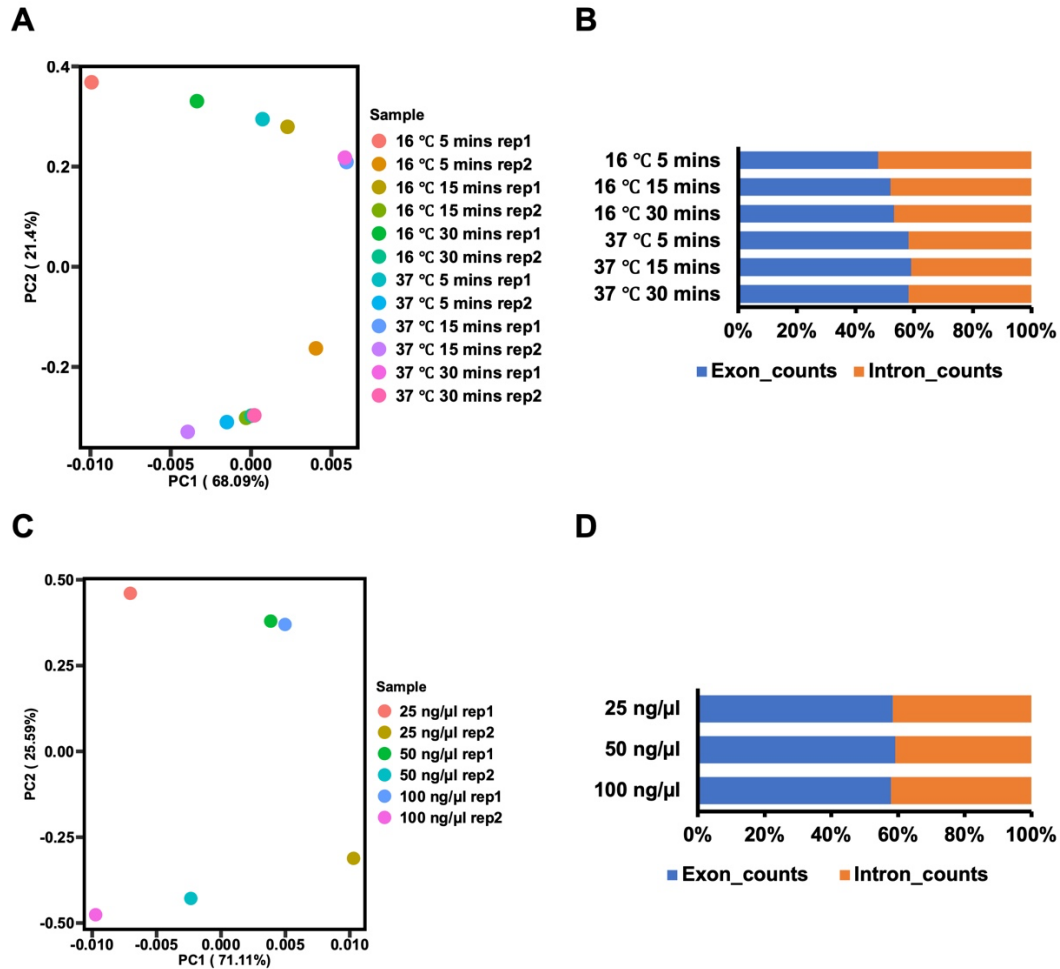

**Supplemental Figure S4. Sequencing libraries generated by different reaction conditions show similar gene expression profiles.**

(A) Gene expression PCA plot showing the principal component between different sequencing results with the indicated reaction time and temperature.

(B) Bar graph showing ratios of detected reads at exons and introns. The number of reads mapped to exons or introns was calculated by Homer. Libraries with the indicated reaction time and temperature were sequenced.

(C) Gene expression PCA plot showing the principal component between different sequencing results with the indicated amounts of Tn5.

(D) Bar graph showing ratios of detected reads at exons and introns among the libraries generated by the indicated amounts of Tn5.

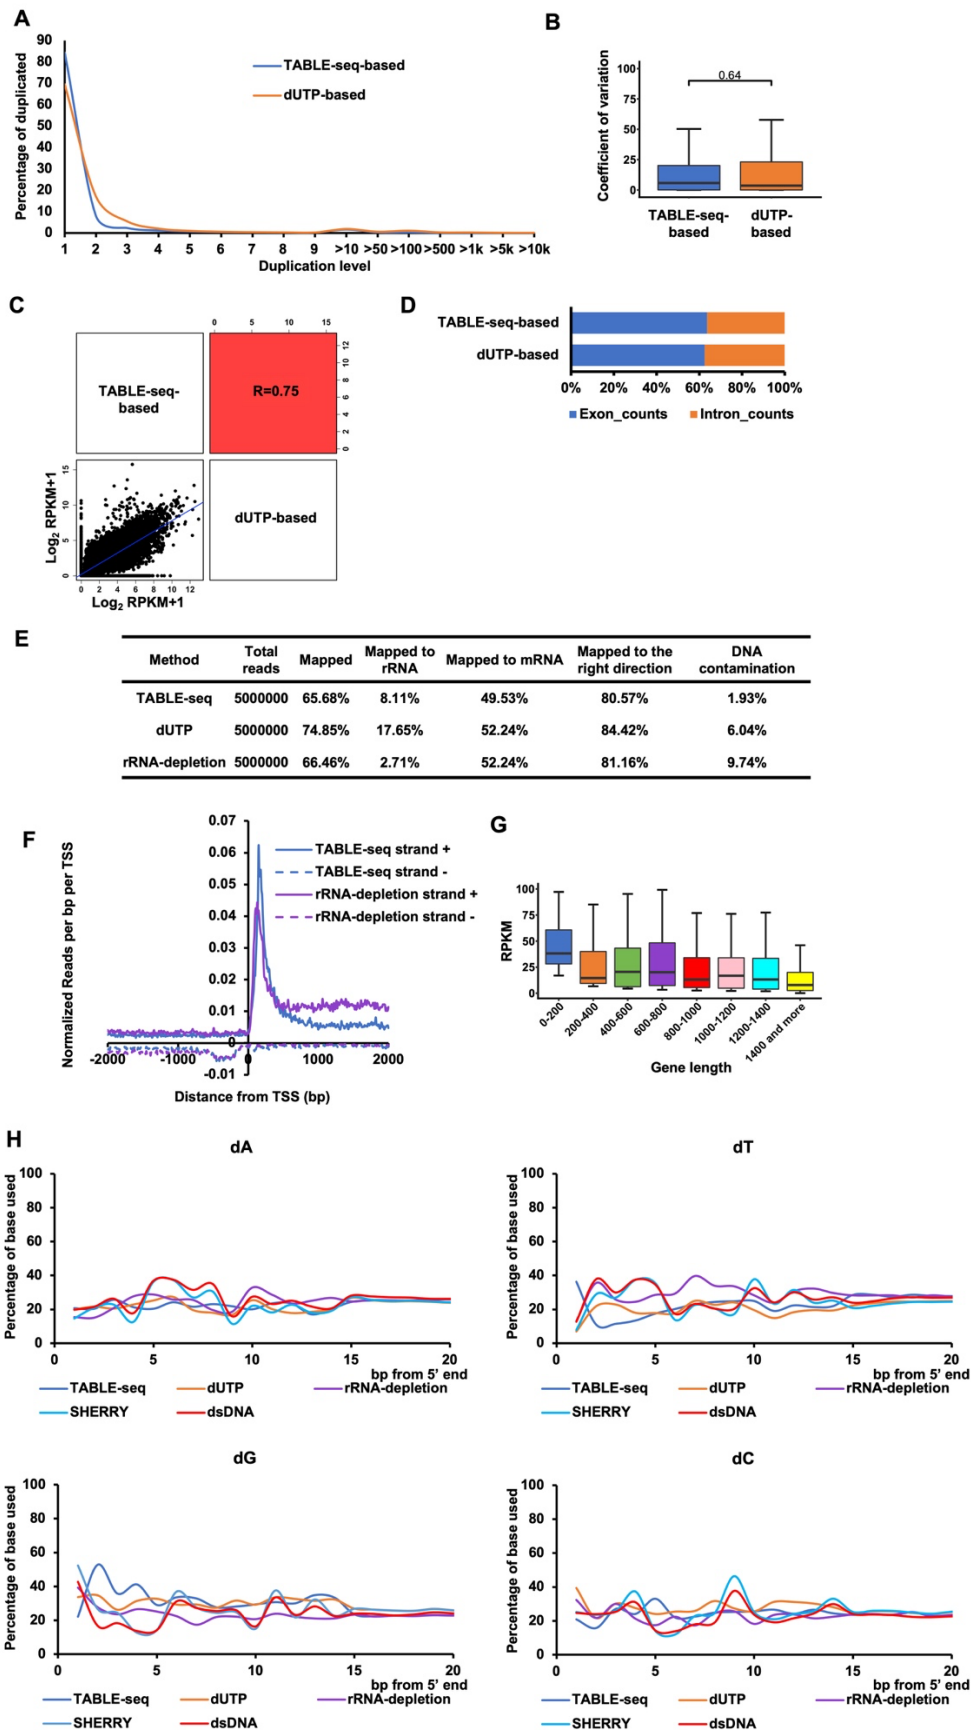

**Supplemental Figure S5. TABLE-seq and dUTP based sequencing libraries exhibit similar gene expression profiles.**

- (A) The level of reads duplicates in TABLE-seq- and dUTP-based methods.
- (B) Coefficient of variation of TABLE-seq- and dUTP-based methods. The variation between each gene in two replicates was calculated.
- (C) The Pearson's correlations among libraries generated by the indicated library construction methods. The scatter plots showed all detected genes. RPKM, reads per kilobase of exon per million reads mapped.
- (D) Bar graph showing ratios of detected reads at exons and introns. The number of reads mapped to exons or introns was calculated by Homer. Libraries constructed with the indicated methods were sequenced.
- (E) Library quality of TABLE-seq-, dUTP-, and rRNA depletion-based methods.
- (F) Comparison of sequencing signals between libraries generated by the indicated methods. Sense (strand +) and antisense (strand -) transcripts associated with transcription start site (TSS) were shown.
- (G) The expression levels of genes with different lengths in mESC. The sequencing data used were from TABLE-seq. RPKM, reads per kilobase of exon per million reads mapped.
- (H) The base preferences at first 20 base pairs among different sequencing methods.

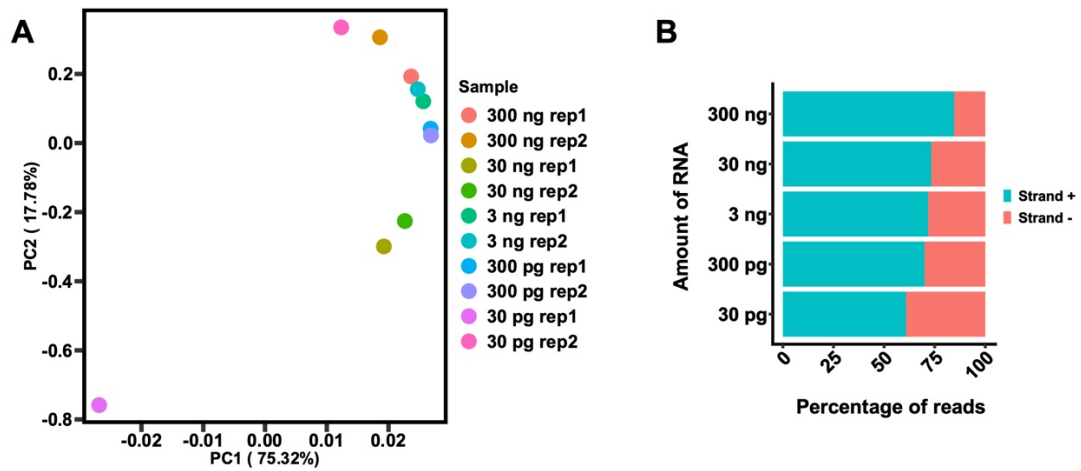

**Supplemental Figure S6. TABLE-seq can be applied to strand-specific RNA sequencing.**

(A) Gene expression PCA plot showing the principal component among different sequencing results.

(B) Bar graph showing the ratio of reads mapped to sense (+) and antisense (-) strands among different sequencing results.



**Supplemental Table S1. Oligonucleotides used in the study.**

| Name                    | 5'- 3'                                                                                                                                                                                                                                                                                                                                                                                                            | Application          |
|-------------------------|-------------------------------------------------------------------------------------------------------------------------------------------------------------------------------------------------------------------------------------------------------------------------------------------------------------------------------------------------------------------------------------------------------------------|----------------------|
| Tn5ME-A                 | TCGTCGGCAGCGTCAGATGTGTATAAGAGACAG                                                                                                                                                                                                                                                                                                                                                                                 | Transposons Assembly |
| Tn5ME-B                 | GTCTCGTGGGCTCGGAGATGTGTATAAGAGACAG                                                                                                                                                                                                                                                                                                                                                                                | Transposons Assembly |
| Tn5ME-A-5'AF488         | [AF488]TCGTCGGCAGCGTCAGATGTGTATAAGAGACAG                                                                                                                                                                                                                                                                                                                                                                          | Transposons Assembly |
| Tn5MErev                | [phos]CTGTCTCTTATACACATCT                                                                                                                                                                                                                                                                                                                                                                                         | Transposons Assembly |
| 5ph_Tn5a                | [phos]CTGTCTCTTATACACATCTGACGCTGCCGACGA                                                                                                                                                                                                                                                                                                                                                                           | Adaptor anneal       |
| Tn5a_N6_invert_dT       | TCGTCGGCAGCGTCAGATGTGTATAAGAGACAGNNNNNN[invert dT]                                                                                                                                                                                                                                                                                                                                                                | Adaptor anneal       |
| Tn5a                    | CTGTCTCTTATACACATCTGACGCTGCCGACGA                                                                                                                                                                                                                                                                                                                                                                                 | Adaptor anneal       |
| 5'_N6_Tn5a_invert_dT_3' | NNNNNNTCGTCGGCAGCGTCAGATGTGTATAAGAGACAG[invert dT]                                                                                                                                                                                                                                                                                                                                                                | Adaptor anneal       |
| H3.1F-5'AF594           | [AF594]ATATAGGATCCATGGCTCGTACGAAGCAAAC                                                                                                                                                                                                                                                                                                                                                                            | Asymmetric PCR       |
| H3.1R                   | TATAACTCGAGCTAGGCGTAGTCGGGCACGTC                                                                                                                                                                                                                                                                                                                                                                                  | Asymmetric PCR       |
| ss400F                  | GCGTGAAGAAACCTCATCGC                                                                                                                                                                                                                                                                                                                                                                                              | Asymmetric PCR       |
| ss300F                  | CCAGCGCCTGGTGCGAGAAATC                                                                                                                                                                                                                                                                                                                                                                                            | Asymmetric PCR       |
| ss200F                  | GTGGGACTCTTCGAAGACAC                                                                                                                                                                                                                                                                                                                                                                                              | Asymmetric PCR       |
| ss160F                  | CTAAACGCGTCACCATCATG                                                                                                                                                                                                                                                                                                                                                                                              | Asymmetric PCR       |
| ss130F                  | TCCAGCTGGCACGTCGCATC                                                                                                                                                                                                                                                                                                                                                                                              | Asymmetric PCR       |
| ss400bpoligo            | ACACTTTTGTGTGTGCTCTCATTGCAAATGGCTCGTACGAAGCAAACAGCTCGCAAGTCTACCGGCGGCAAAGCTCCGCGCAAGCAGCTTGCTACTAAAGCAGCCCGTAAGAGCGCTCCGGCCACCGGTGGCGTGAAGAAACCTCATCGCTACCGCCCGGGCACCGTGGCCTTGCGCGAAA<br>TCCGTCGCTACCAGAAGTCCACCGAGCTGTGATCCGGAAGCTGCCGTTCCAGCGCCTGGTGCAGAGAAATCGCCAGGACTTCAAAACCGACCTGCGTTTCCAGAGCTCTGCGGTGATGCGCTGCAGGAGGCTTGTGAGGCCTACCTGGTGGGACTCTTCGAAGACACCAATCTGTGCGCTATTACGCTAAACGCGTCACCATCATGCCCAAAGATA | Tn5 tagmentation     |

|            |                                                                                                                                                                                                                                                                                                                                                |                    |        |     |
|------------|------------------------------------------------------------------------------------------------------------------------------------------------------------------------------------------------------------------------------------------------------------------------------------------------------------------------------------------------|--------------------|--------|-----|
| ss300oligo | ACACTTTTGTGTGTGCTCTCATTGCAAATGG<br>CTCGTACGAAGCAAACAGCTCGCAAGTCTA<br>CCGGCGGCAAAGCTCCGCGCAAGCAGCTTG<br>CTACTAAAGCAGCCCGTAAGAGCGCTCCGG<br>CCACCGGTGGCGTGAAGAAACCTCATCGCT<br>ACCGCCCGGGCACCGTGGCCTTGCGCGAAA<br>TCCGTCGCTACCAGAAGTCCACCGAGCTGC<br>TGATCCGGAAGCTGCCGTTCCAGCGCCTGG<br>TGCAGAAATCGCCAGGACTTCAAAACCG<br>ACCTGCGTTTCCAGAGCTCTGCGGTGATG | Tn5 tagmentation   |        |     |
| ss200oligo | ACACTTTTGTGTGTGCTCTCATTGCAAATGG<br>CTCGTACGAAGCAAACAGCTCGCAAGTCTA<br>CCGGCGGCAAAGCTCCGCGCAAGCAGCTTG<br>CTACTAAAGCAGCCCGTAAGAGCGCTCCGG<br>CCACCGGTGGCGTGAAGAAACCTCATCGCT<br>ACCGCCCGGGCACCGTGGCCTTGCGCGAAA<br>TCCGTCGCTACCAGAAGTC                                                                                                               | Tn5 tagmentation   |        |     |
| ss110oligo | GGTATCAACGCAGAGTACATGTCATTTTTTT<br>TTTTTTTTTTTTTTTTTTTTTTTTTTTTTTTT<br>TTTTTTTTTTTTTTTTTTTTTTTTTTTTTTCTTG<br>TACAGCTCGTCC                                                                                                                                                                                                                      | Tn5 tagmentation   |        |     |
| Index-F1   | AATGATACGGCGACCACCGAGATCTACACTA<br>GATCGCTCGTCGGCAGCGTCAGATGTGTAT                                                                                                                                                                                                                                                                              | Forward<br>library | primer | for |
| Index-F2   | AATGATACGGCGACCACCGAGATCTACACCT<br>CTCTATTCGTCGGCAGCGTCAGATGTGTAT                                                                                                                                                                                                                                                                              | Forward<br>library | primer | for |
| Index-F3   | AATGATACGGCGACCACCGAGATCTACACTA<br>TCCTCTTCGTCGGCAGCGTCAGATGTGTAT                                                                                                                                                                                                                                                                              | Forward<br>library | primer | for |
| Index-F4   | AATGATACGGCGACCACCGAGATCTACACA<br>GAGTAGATCGTCGGCAGCGTCAGATGTGTAT                                                                                                                                                                                                                                                                              | Forward<br>library | primer | for |
| Index-F5   | AATGATACGGCGACCACCGAGATCTACACGT<br>AAGGAGTCGTCGGCAGCGTCAGATGTGTAT                                                                                                                                                                                                                                                                              | Forward<br>library | primer | for |
| Index-F6   | AATGATACGGCGACCACCGAGATCTACACA<br>CTGCATATCGTCGGCAGCGTCAGATGTGTAT                                                                                                                                                                                                                                                                              | Forward<br>library | primer | for |
| Index-R1   | CAAGCAGAAGACGGCATAACGAGATTCGCCT<br>TAGTCTCGTGGGCTCGGAGATGTG                                                                                                                                                                                                                                                                                    | Reverse<br>library | primer | for |
| Index-R2   | CAAGCAGAAGACGGCATAACGAGATCTAGTA<br>CGGTCTCGTGGGCTCGGAGATGTG                                                                                                                                                                                                                                                                                    | Reverse<br>library | primer | for |
| Index-R3   | CAAGCAGAAGACGGCATAACGAGATAGGAGT<br>CCGTCTCGTGGGCTCGGAGATGTG                                                                                                                                                                                                                                                                                    | Reverse<br>library | primer | for |

**Supplemental Table S2. Correlations between two replicates. A 10 bp sliding window across the ssDNA region was used to calculate the Pearson's product moment correlation for ssDNA sequencing. The correlation of gene expression repeats was calculated by the coefficient of determination ( $R^2$ ) of their shared genes' RPKM values.**

| Samples                      | Correlation |
|------------------------------|-------------|
| ssDNA                        | 0.99        |
| dUTP_based                   | 0.99        |
| TABLE-seq_frag               | 0.98        |
| TABLE-seq_unfrag             | 0.99        |
| TABLE-seq_RNA 300ng          | 0.86        |
| TABLE-seq_RNA 30ng           | 0.85        |
| TABLE-seq_RNA 3ng            | 0.82        |
| TABLE-seq_RNA 300pg          | 0.60        |
| TABLE-seq_RNA 30pg           | 0.45        |
| TABLE-seq_16°C 5min          | 0.84        |
| TABLE-seq_16°C 15min         | 0.82        |
| TABLE-seq_16°C 30min         | 0.78        |
| TABLE-seq_37°C 5min          | 0.80        |
| TABLE-seq_37°C 15min         | 0.83        |
| TABLE-seq_37°C 30min         | 0.85        |
| TABLE-seq_TN5_25ng/ $\mu$ l  | 0.79        |
| TABLE-seq_TN5_50ng/ $\mu$ l  | 0.78        |
| TABLE-seq_TN5_100ng/ $\mu$ l | 0.75        |
